# Supplementary material for: Flux synthesis and thermoelectric properties of eco-friendly Sb doped Mg2Si0.5Sn0.5 solid solutions for energy harvesting
Source: Royal Society of Chemistry journal article supplement (doi:10.1039/c1jm00025j), 2011-01-01
Supplement: c1jm00025j.pdf [file c1jm00025j.pdf]

Supporting Information:

## Flux synthesis and thermoelectric properties of eco-friendly Sb doped $\text{Mg}_2\text{Si}_{0.5}\text{Sn}_{0.5}$ solid solution for energy harvesting

*Hongli Gao, Tiejun Zhu<sup>\*</sup>, Luxin Chen, Xinxin Liu, Xinbing Zhao*

State Key Laboratory of Silicon Materials and Department of Materials Science and  
Engineering, Zhejiang University, Hangzhou 310027, China

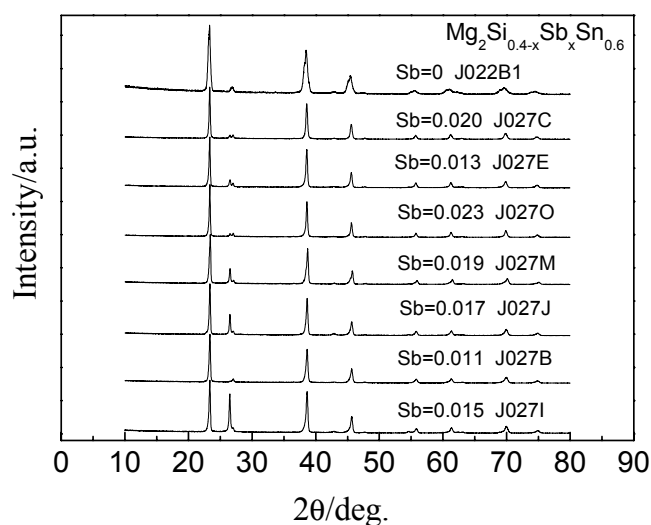

Figure S1. XRD patterns of flux synthesized  $\text{Mg}_2\text{Si}_{0.4-x}\text{Sb}_x\text{Sn}_{0.6}$  alloys.

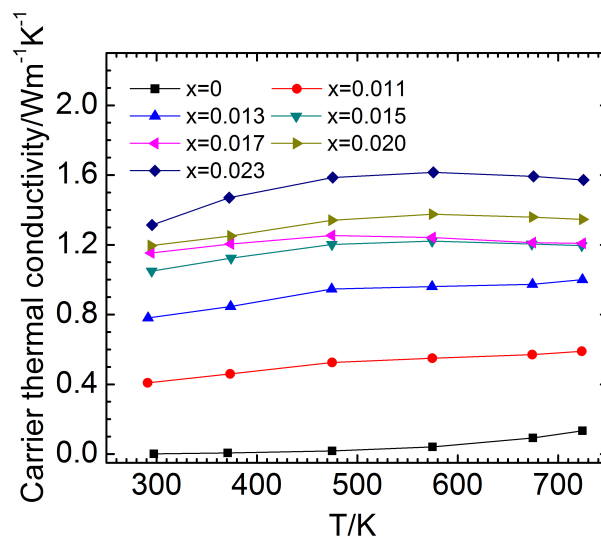

Figure S2. Carrier thermal conductivity for  $\text{Mg}_2\text{Si}_{0.5-x}\text{Sn}_{0.5}\text{Sb}_x$  samples.

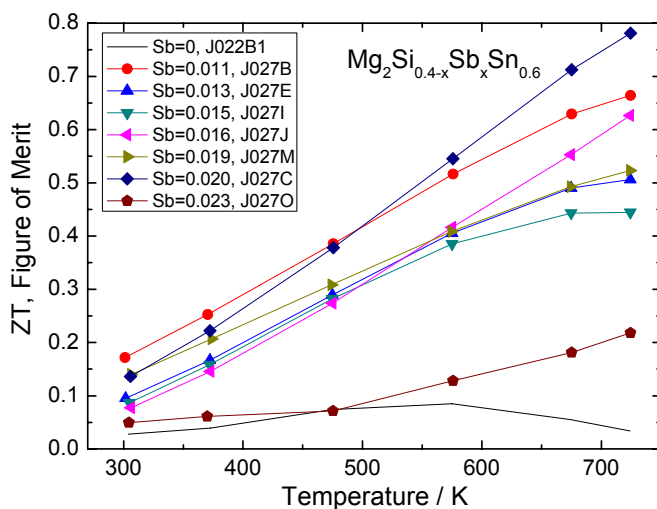

Figure S3. Temperature dependence of  $ZT$  of the flux synthesized  $\text{Mg}_2\text{Si}_{0.4-x}\text{Sb}_x\text{Sn}_{0.6}$  alloys.

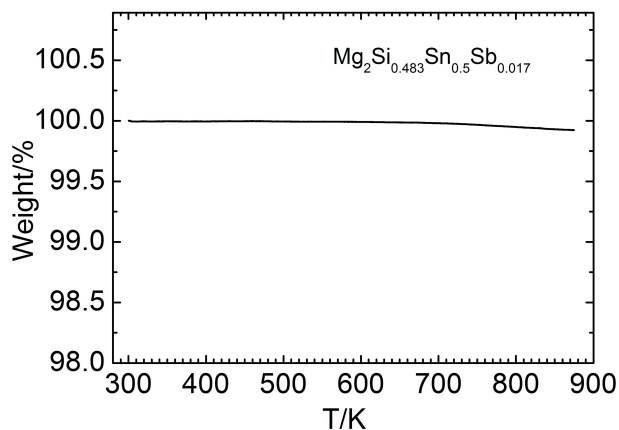

Figure S4. TG curve for the  $\text{Mg}_2\text{Si}_{0.483}\text{Sn}_{0.5}\text{Sb}_{0.017}$  sample.

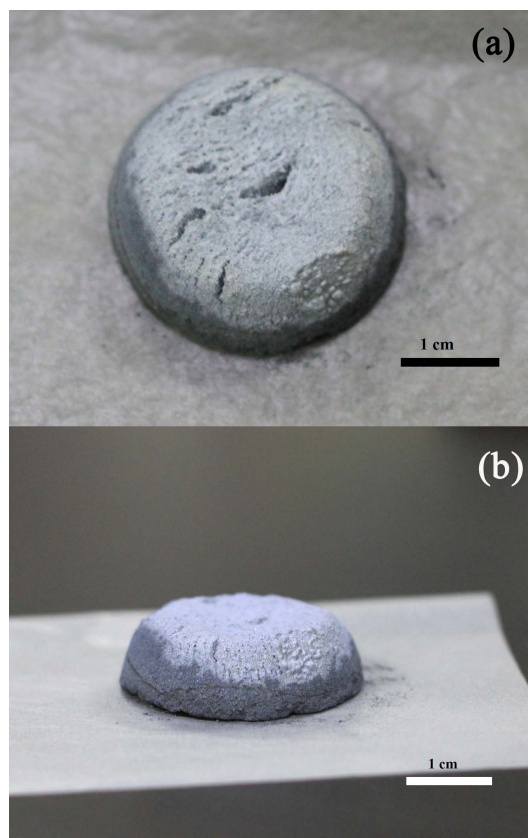

Figure S5. A large size of flux synthesized  $\text{Mg}_2\text{Si}_{0.5}\text{Sn}_{0.5}$  based alloys showing the scale-up capability of the method. The ingot is about 15 g compared to usual 3g of products in this work due to a larger crucible used.
